# A genome-scale study of metabolic complementation in endosymbiotic consortia: the case of the cedar aphid.

Miguel Ponce-de-Leon<sup>1\*</sup>, Daniel Tamarit<sup>2</sup>, Jorge Calle-Espinosa<sup>1</sup>, Matteo Mori<sup>3</sup>, Amparo Latorre<sup>4,5</sup>, Francisco Montero<sup>1</sup>, Juli Pereto<sup>5,6\*</sup>

<sup>1</sup>Departamento de Bioquímica y Biología Molecular I, Facultad de Ciencias Químicas, Universidad Complutense de Madrid, Madrid, ES

<sup>2</sup>Uppsala University, Department of Molecular Evolution, Biomedical Center, Uppsala, SE

<sup>3</sup>Department of Physics, University of California, San Diego, La Jolla, CA, USA

<sup>4</sup>Departament de Genètica, Universitat de València, València, ES

<sup>5</sup>Institute for Integrative Systems Biology I2SysBio (Universitat de València-CSIC), València, ES

<sup>6</sup>Departament de Bioquímica i Biologia Molecular, Universitat de València, València, ES

## Abstract

Bacterial endosymbionts and their insect hosts establish an intimate metabolic relationship. Bacteria offer a variety of essential nutrients to their hosts, whereas insect cells provide the necessary sources of matter and energy to their tiny metabolic allies. These nutritional complementations sustain themselves on a diversity of metabolite exchanges between the cell host and the reduced yet highly specialized bacterial metabolism –which, for instance, overproduces a small set of essential amino acids and vitamins. A well-known case of metabolic complementation is provided by the cedar aphid *Cinara cedri* that harbors two co-primary endosymbionts, *Buchnera aphidicola* BCc and *Ca. Serratia symbiotica* SCc, and in which some metabolic pathways are partitioned between different partners. Here we present a genome scale metabolic network (GEM) for the bacterial consortium from the cedar aphid *iBSCc*. The analysis of this GEM allows us the confirmation of cases of metabolic complementation previously described by genome analysis (*i.e.* tryptophan and biotin biosynthesis) and the proposal of a hitherto unnoticed event of metabolic pathway sharing between the two endosymbionts, namely the biosynthesis of tetrahydrofolate. *In silico* knock-out experiments with *iBSCc* showed that the consortium metabolism is a highly integrated yet fragile network. We also have explored the evolutionary pathways leading to the emergence of metabolic complementation between reduced metabolisms starting from individual, complete networks. Our results suggest that, during the establishment of metabolic complementation in endosymbionts, adaptive evolution is more significant than previously thought.

Key words: endosymbiotic bacteria, cross-feeding, metabolic modeling

\* Corresponding authors:

- Miguel Ponce-de-Leon: [migponce@ucm.es](mailto:migponce@ucm.es)

- Juli Pereto: [pereto@uv.es](mailto:pereto@uv.es)

## 41 Introduction

42 Species coexisting in a determined environment establish a network of interactions  
43 moulded by biotic and abiotic factors (Faust and Raes, 2012; Seth and Taga, 2014). From a  
44 molecular point of view, such networks can be considered as an entangled circuitry of various  
45 metabolisms interconnected by the exchange of compounds. In the mutualistic symbioses, where  
46 partners exchange nutrients or precursors bi-directionally, the nutritional interdependence will  
47 lead, in most cases, to a co-evolutionary process. A particular case occurs when the host cells  
48 harbour one or more symbionts inside them (*i.e.* endosymbionts). As a consequence of the  
49 adaptation to the intracellular life, the endosymbionts undergo many biochemical and structural  
50 changes, with extreme genome reduction by gene loss being the most dramatic one, compared to  
51 their closest free-living relatives (Manzano-Marín and Latorre, 2016; Moran, 1996; Moran and  
52 Bennett, 2014; Moya et al., 2008). Gene losses in endosymbionts result in the total or partial  
53 demolition of metabolic pathways, and thus endosymbionts become auxotroph for a diversity of  
54 compounds, such as nucleotides or amino acids.

55 The description of nutritional interactions between hosts and symbionts (and among  
56 symbionts in consortia) usually relies on the concept of “metabolic complementation”, for which  
57 at least two distinct meaning have been used. First, we can consider the exchange of essential  
58 components (*e.g.* vitamins and amino acids) between host and endosymbiont (López-Sánchez et  
59 al., 2009; Macdonald et al., 2012; Moya et al., 2008; Russell et al., 2013; Wu et al., 2006), a  
60 phenomenon usually known as cross-feeding. Second, metabolic complementation also refers to  
61 more complex scenarios where pathways can be fragmented and distributed between the members  
62 of the association (Price and Wilson, 2014; Van Leuven et al., 2014). Various examples of  
63 metabolic complementation in insect endosymbionts have been described in the past (Baumann  
64 et al., 2006; Manzano-Marín and Latorre, 2016; McCutcheon and Moran, 2011). As an example,  
65 some endosymbionts hosted by phloem-feeding insects (*e.g.* *Buchnera aphidicola*, *Candidatus*  
66 *Tremblaya princeps*, *Candidatus* Portiera aleyrodidarum) upgrade the host diet by supplying  
67 essential amino acids and vitamins absent in the diet (Baumann et al., 2006; McCutcheon and von  
68 Dohlen, 2011; Zientz et al., 2004). In other cases, as the cockroach endosymbiont *Blattabacterium*  
69 *cuenoti*, the assembly of metabolic reactions from the host and the symbiont allows the  
70 mobilisation of the host nitrogen reservoirs (Patiño-Navarrete et al., 2014).

71 A remarkable case of endosymbiont consortia has been described in the cedar aphid  
72 *Cinara cedri* (Lamelas et al., 2011a; Pérez-Brocal et al., 2006). In this system, two species of  
73 endosymbiotic bacteria coexist. As it is the case in most aphid species, the primary (obligate)  
74 endosymbiont is *B. aphidicola* BCc, albeit in this insect species there is always a second (co-  
75 primary) endosymbiont, *Candidatus* *Serratia symbiotica* SCc (hereafter referred to as *S.*  
76 *symbiotica* SCc, Gómez-Valero et al., 2004). The genomic analysis of this consortium has shown  
77 that many biosynthetic pathways are coded only in one of the two endosymbiont genomes, thus  
78 leading to obligate cross-feeding. Nonetheless, it is remarkable that the tryptophan biosynthetic  
79 pathway is split in two halves: *Buchnera* is able to synthesize up to anthranilate, whereas *Serratia*  
80 uses this anthranilate to synthesize tryptophan, which is required by all the members of the  
81 consortium (Gosalbes et al., 2008). The existence of metabolic complementations between  
82 endosymbionts and their host and, particularly, between the members of the bacterial consortium

83 (as it is the case with the biosynthesis of tryptophan), poses several evolutionary questions: does  
84 complementation generate an adaptive advantage for the system as a whole? And if this is the  
85 case, what is the nature of such advantage? Some theoretical studies have tried to illuminate  
86 whether the organisms exhibiting some degree of cooperation, as it is the case of cross-feeding,  
87 show some increase in their growth rate, compared to non-cooperative strains (Germerodt et al.,  
88 2016; Großkopf and Soyer, 2016). Furthermore, the metabolic pathway sharing between two  
89 endosymbionts has been suggested as a strategy to increase the efficiency of the biosynthesis of  
90 compounds when feedback inhibition is present in the pathway (Mori et al., 2016). Nevertheless,  
91 the emergence of such patterns of complementation poses diverse biophysical problems. For  
92 instance, the exchange of intermediates between endosymbionts implies a transport of solutes. It  
93 is well known that endosymbionts harbour a limited repertoire of transporters (Charles et al.,  
94 2011) and, on the other hand, the existence of membrane transporters specific for metabolic  
95 intermediates is very unusual. As a result, the exchanges should occur by simple diffusion and  
96 this situation imposes restrictions since metabolic intermediates usually show very low diffusion  
97 rates (Mori et al., 2016).

98 Another important matter in the evolution of endosymbiotic bacteria is the interplay  
99 between chance and necessity during the genome reduction process (Sabater-Muñoz et al., 2017).  
100 Although it is reasonable to accept the force of purifying selection, it is not clear if the patterns of  
101 complementation exhibited in these systems are the outcome of a random process, or if the  
102 observed patterns reflect an advantage over alternative evolutionary trajectories. In other words,  
103 to what extent are the evolutionary histories of these systems predictable? *In-silico* evolutionary  
104 experiments using genome-scale metabolic models (GEM) of two different endosymbionts (*B.*  
105 *aphidicola* and *Wigglesworthia glossinidia*) showed that the present gene content of these  
106 symbionts can be predicted with over 80% accuracy, from distant ancestors of the organisms and  
107 considering their current lifestyle (Pál et al., 2006). Similar studies have analysed the fragility of  
108 the reduced metabolism to conclude that, in general, these networks cannot be further reduced  
109 (Belda et al., 2012; Calle-Espinosa et al., 2016; González-Domenech et al., 2012; Pál et al., 2006;  
110 Ponce-de-Leon et al., 2013; Thomas et al., 2009). A recent application of metabolic flux analysis  
111 to an endosymbiotic consortium has revealed distinct benefits and costs of the symbionts to their  
112 host (Ankrah et al., 2017), highlighting how the analysis of GEMs can be successfully applied to  
113 study endosymbiotic consortia.

114 Herein, we are interested in studying the interplay of chance and necessity in the evolution  
115 and emergence of metabolic complementation in endosymbiotic consortia. For this purpose, we  
116 have chosen the well documented case of the consortium formed by the primary and co-primary  
117 endosymbionts of the cedar aphid, *B. aphidicola* BCc and *S. symbiotica* SCc. Individual GEMs  
118 have been reconstructed, manually curated and analysed for each individual bacterium, based on  
119 their corresponding genome annotations. After extensive manual curation, these two models were  
120 used to create a compartmentalized consortium model named *iBSCc*, which also include a set of  
121 key enzymatic activities performed by the host. We assessed the metabolic connections between  
122 the two endosymbionts and also with the host to predict patterns of metabolic complementations.  
123 We observed that the combination of these two extremely reduced metabolic networks results in  
124 an integrated yet fragile system. Finally, we performed *in-silico* evolutionary experiments to study  
125 the paths leading to the emergence of metabolic complementation.

## 126 Materials and Methods

### 127 Annotated genomes

128 In order to reconstruct the genome-scale metabolic models (GEM) of *S. symbiotica* SCc and *B.*  
129 *aphidicola* BCc, we retrieved the corresponding genomes and the semi-automatically  
130 reconstructed Pathway-Genome Databases (PGDB) available in the BioCyc collection in (Caspi  
131 et al., 2014). The used PGDBs' versions were SSYM568817 19.0 for *S. symbiotica* SCc, and  
132 BAPH37261 19.0 for *B. aphidicola* BCc (both available in Tier 3 at BioCyc 19.0) (See  
133 supplementary Text S2). The public version of BAPH372461 does not include the information  
134 encoded in the pTpr-BCc plasmid (accession number EU660486.1 (Gosalbes et al., 2008). This  
135 plasmid contains two genes (*trpE* and *trpG*) (Table 1), and was manually added to a local version  
136 of the *B. aphidicola* BCc PGDB, created through Pathway Tools v. 19.0 (Karp et al., 2015). Once  
137 added, the PathoLogic algorithm was run again in order to update the pathway prediction.

### 138 Reconstruction and refinement of the metabolic models

139 The reconstruction and refinement of the metabolic models was performed following the  
140 protocol described by Thiele and Palsson (2010). In order to reconstruct the metabolism of *S.*  
141 *symbiotica* SCc, the GEM of *E. coli* K12 MG1655 *iJO1366* (Orth et al., 2011) was used as a  
142 reference, since this is the phylogenetically closest free-living organism for which a highly refined  
143 and validated model exists. First, orthologous genes were identified between the *E. coli* K12  
144 MG1655 genome (available in EcoCyc 19.0) and the *S. symbiotica* SCc genome included in the  
145 PGDB SSYM568817 19.0. Gene sequences were extracted, translated and compared using *Blastp*  
146 (Altschul et al., 1990) with an e-value maximum of  $10^{-10}$  and an identity minimum of 75%.  
147 Orthologs were then identified using OrthoMCL (Li et al., 2003). Combining these results with  
148 the set of reactions and pathways present in the SSYM568817 PGDB, a gene-protein-reaction  
149 (GPR) table was constructed. Using this GPR table, together with the *iJO1366* model and the  
150 BiGG database (Schellenberger et al., 2010) a first version of the *S. symbiotica* SCc model was  
151 reconstructed. Moreover, the biomass equation introduced in the model is a modified version of  
152 the one present in *iJO1366*, from which we removed membrane components and cofactors absent  
153 in the *S. symbiotica* SCc network. The coefficients were corrected using the methodology  
154 suggested by Henry et al. (2010). The first draft obtained was revised combining the unconnected  
155 module (UM) approach (Ponce-de-Leon et al., 2013) together with the previously published  
156 genome analyses (Lamelas et al., 2011a). Regarding the metabolism of *B. aphidicola* BCc, a  
157 previously published GEM, named BCc (Belda et al., 2012), was used as a reference. However,  
158 this GEM contained several blocked reactions and dead-end metabolites. The resolution of the  
159 different gaps was performed by solving the set of UMs combining the pathway inferences present  
160 in the BAPH372461 PGDB and the GEM of *B. aphidicola* Bap (MacDonald et al., 2011),  
161 available in BioModels (MODEL1012300000).

### 162 Construction of a biomass equation for the aphid *C. cedri*

163 The aphid biomass equation was defined by including the various biomass components in  
164 corresponding stoichiometric proportions. Since the consortium model does not include the

165 metabolism of the host, the aphid biomass equation only includes the compounds that are provided  
166 by the endosymbiotic consortium (*i.e.* the essential amino acids, vitamins and cofactors) as  
167 previously done (Calle-Espinosa et al., 2016). The stoichiometric coefficients for the set of amino  
168 acids provided by the endosymbionts were estimated from the analysis of composition of the  
169 *Aphis fabae* and *Acyrtosiphon pisum* proteomes (Douglas et al., 2001; Russell et al., 2014). The  
170 compositions measured in two different aphid species showed good agreement, a fact that  
171 suggests that the values can be extrapolated to *C. cedri* (see Supplementary Text S1). We used  
172 the values from the experimental measurements of the *A. pisum* amino acid composition obtained  
173 by Russell et al., (2014) because this dataset includes the measurements of certain amino acids  
174 not included in Douglas et al. (2001). The values were normalised to represent composition in 1  
175 g of dry weight (DW) in the aphid biomass. Additionally, the cofactors provided by the  
176 endosymbiotic consortium to the host were added. Since there is no estimation of their proportion  
177 in the aphid biomass, their values were set to be several orders of magnitude below the amino  
178 acids demand, but reflecting their essentiality to the host (Supplementary Table S5).

## 179 Constraint-based modeling methods

180 The different constraint-based methods used in the present work correspond to the current  
181 implementation found in COBRApy toolbox 0.6 (Ebrahim et al., 2013). The boundary conditions  
182 used in the individual analyses of the endosymbionts models, *iSCc226* and *iBCc98*, can be found  
183 in Supplementary Tables S1 and S2, respectively. However, in the case of the compartmentalized  
184 model of the consortium, a restriction that limits the total number of carbon atoms diffusing  
185 through the membrane of each endosymbiont was introduced (Burgard et al., 2001). By doing so,  
186 we are able to separately constrain the exchange of metabolites of each endosymbiont with its  
187 surrounding environment without the need of establishing arbitrary boundary for each exchange  
188 flux. Thus, instead of having a large set of parameters, one for each exchange flux, we only used  
189 two parameters, one for each endosymbiont. The restriction can be expressed as the following  
190 linear inequality:

$$191 \quad \sum_{i \in T_k} v_i \cdot nc_i \leq UB \quad \forall k \in \{BCc, SCc\} \quad (1)$$

192 Where  $T_k \subset J$  is the set of indexes of the transporters present in the compartment  $k$   
193 (endosymbiont) and  $J$  the set of all fluxes;  $v_i$  is the flux through the transporter  $i$ ;  $nc_i$  is the  
194 number of carbon atoms in the transported molecule; and  $UB$  is the upper bound, *i.e.* the parameter  
195 establishing the maximum number of carbon atoms that can be exchanged by the  $\alpha$  compartment  
196 (one of the endosymbionts) and the extracellular compartment (the host cell). This parameter  
197 limits the amount of matter flowing through the membrane in terms of the total carbon atoms and  
198 was fixed to 100 carbon atoms. In order to guarantee that the transport fluxes are non-negative,  
199 the reversible transporters were split into two irreversible transport reactions with opposite  
200 direction (Burgard et al., 2001). The biosynthetic capabilities of the endosymbionts for each  
201 biomass component, as well as for energy production, were assessed using Flux Balance Analysis  
202 (FBA) (Orth et al., 2010). Furthermore, network fragility was predicted through in-silico  
203 knockout experiments conducted using FBA as well as the Minimization of the Metabolic  
204 Adjustment (MOMA) (Segrè et al., 2002). Details on each method can be found in the extended  
205 materials and methods (see Supplementary Text S2).



## 206 Results

### 207 Metabolic reconstruction of the cedar aphid primary and co-primary 208 endosymbionts

209 The metabolic models of *S. symbiotica* SCc and *B. aphidicola* BCc were reconstructed  
210 individually, and were named *iSCc236* and *iBCc98*, respectively (see Supplementary Text S1 for  
211 further details on the reconstruction, and Supplementary Tables S1 and S2 for the complete  
212 models). The former consisted of 267 intracellular metabolites and 209 reactions catalysed by the  
213 products of 236 genes, plus 11 orphan reactions (*i.e.* reactions with unknown coding genes). It  
214 also includes 30 transporters associated with a gene, and 49 orphan transport reactions. On the  
215 other hand, *iBCc98* yielded a smaller network, containing 155 intracellular metabolites and 95  
216 reactions catalysed by the products of 98 genes, and 8 additional orphan reactions. Additionally,  
217 it includes only 5 transporters associated with a gene, and 58 orphan transporters. In both cases,  
218 all orphan reactions are required by the model in order to predict biomass formation. The genomes  
219 of these endosymbionts contain only a small set of genes coding for substrate-specific transport  
220 systems (Charles et al., 2011; Wernegreen, 2002). However, the corresponding metabolic models  
221 predict the necessity of metabolite transit through the endosymbiont membrane, albeit the  
222 transport mechanisms have not been elucidated in many cases, in which simple diffusion has been  
223 proposed as a plausible mechanism (Mori et al., 2016)The metabolic requirements and the  
224 biosynthetic capabilities for each of these two models were congruent with those inferred from  
225 genomic analyses (Lamelas et al., 2011a), with the exception of the biosynthesis of asparagine,  
226 which is predicted by the *iSCc236* model to be required as nutritional input provided by the host  
227 instead of being synthesized by *S. symbiotica* SCc (Supplementary Fig. S1). Finally, when the  
228 energetic capabilities, *i.e.* the synthesis of ATP, was analysed for both symbionts, we found that  
229 *iBCc98* predicts a very low yield of ATP, limitation that is a direct consequence of the absence  
230 of ATP synthase. In turn, this lack of a proton pump mechanism poses a constraint on the  
231 regeneration of NADH, through the NADH dehydrogenase complex. The model suggests that  
232 part of the NADH may be driven through the conversion of the pair homocysteine and serine, into  
233 glycine and methionine (for further details, see Supplementary Text S1).

234 Since we were interested in modeling the whole consortium, the two metabolic models  
235 previously introduced (*iBCc98* and *iSCc236*), were combined to create a single model named  
236 *iBSCc*. Although it is known that *B. aphidicola* BCc population and *S. symbiotica* SCc are hosted  
237 in different bacteriocytes, a more simplistic representation was chosen where both endosymbiont  
238 models are embedded in a single compartment, in a similar way as it has been previously done  
239 (Ankrah et al., 2017). Therefore, our model included: i) a compartment representing the *B.*  
240 *aphidicola* BCc population; ii) a compartment representing the *S. symbiotica* SCc population; and  
241 iii) a single extracellular compartment representing the host cells, where both symbionts are  
242 embedded (**Fig. 1**). Consequently, the boundary of the system was defined by the compartment  
243 representing the host, and exchange fluxes across the boundary represented the metabolites  
244 supplied and consumed by the aphid, as well as the excretion products. The 52 metabolites found  
245 in the extracellular compartment include those obtained from the host, common excretion  
246 products and metabolites exchanged by the two symbionts. Additionally, five reactions were

247 added to the extracellular compartment, as they have been suggested to be performed by the host  
 248 and to play a relevant role in the metabolic complementation between host and symbionts (Hansen  
 249 and Moran, 2011; Poliakov et al., 2011). These reactions include the conversion of phenylalanine  
 250 into tyrosine (1 reaction), the production of homocysteine and adenosyl-methionine from cysteine  
 251 (3 reactions) and the assimilation of sulphidric acid, produced by *S. symbiotica* SCc, for the  
 252 production of lipoate (1 reaction) (see Supplementary table S3).

253

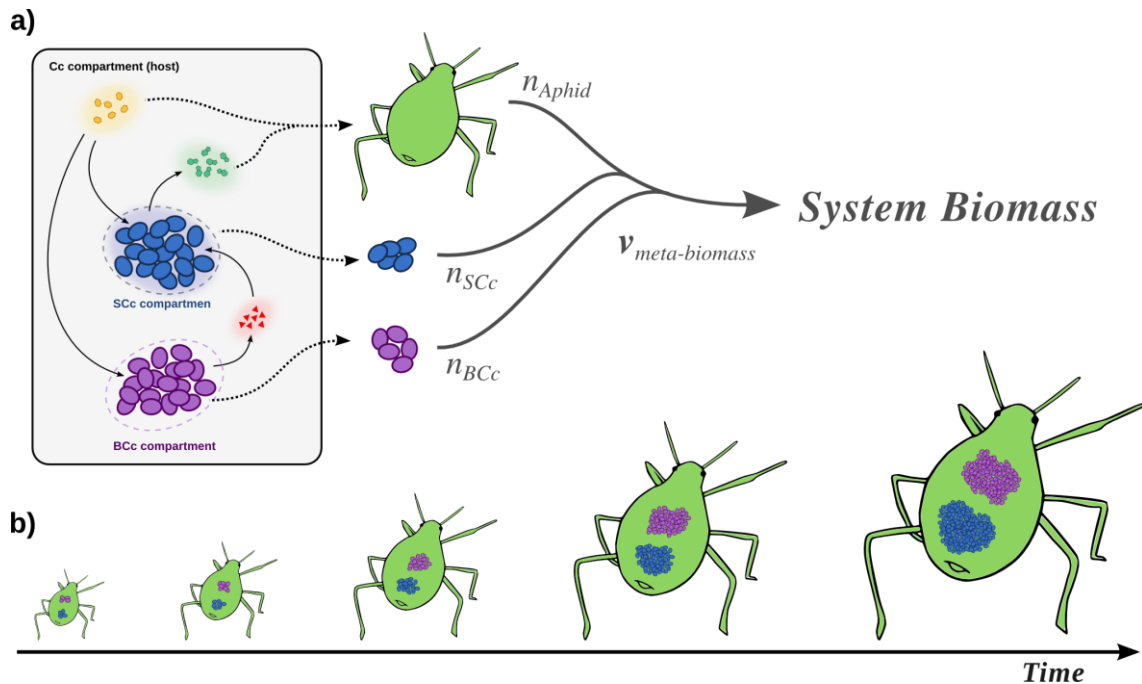

254

255 **Figure 1. Compartment modeling of the cedar aphid endosymbiotic consortium and meta-biomass**  
 256 **equation modeling the growth of the endosymbiotic consortium and the host.** a) Representation of the  
 257 three compartments model of the endosymbiotic consortium. Dotted arrows represent the biomass  
 258 production of each member. The thick tripartite arrow represents the system biomass, i.e. the meta-biomass  
 259 (see main text). The annotations  $n_a$  with  $a \in \{BCc, SCc, Aphid\}$  correspond to the stoichiometric  
 260 contribution of each member to the total system biomass equation. Solid arrows: transport processes within  
 261 the system (e.g. metabolic complementation). b) Coupling between the growths of the members in the  
 262 system, representing stability in the ratio of their biomass.

263 In order to simulate the growth of the system as a whole, we introduced a combined meta-  
 264 biomass equation, where each member contributes to the growth of the system with a fixed  
 265 stoichiometry (**Fig. 1a**). Our model assumes the coupling between the growths of all the members  
 266 of the system, which would especially apply during the development of the host (**Fig. 1b**). This  
 267 assumption is justified by different sources of experimental data as well certain theoretical results  
 268 (see Supplementary Text S1 for further details). Since the exact contribution of the symbionts to  
 269 the cedar aphid biomass is unknown, we used data obtained from *Schizaphis graminum* and *A.*  
 270 *pisum* indicating that their symbionts represent 5-15% of the system's biomass (Baumann et al.,  
 271 2006; Whitehead and Douglas, 1993). Thus, we modelled the proportion between biomass of the  
 272 symbionts and the host to be 1:9. Finally, since imaging data from the cedar aphid bacteriome  
 273 indicates similar proportions between the two symbiont species (Gomez-Valero et al., 2004;  
 274 Pérez-Brocal et al., 2006), we modelled that each bacterial member represents 5% of the system's

275 biomass at every time. It is important to emphasize that this assumption is key for the direct  
276 utilization of FBA and other related techniques in the study of the *iBSCc* model. The reason is  
277 that, if both symbionts are in proportion 1:1, the fluxes are normalized by the same quantity (e.g.  
278 dry weight of bacteria) and they grow necessarily at the same growth rate. This means that they  
279 behave essentially as one “big” bacteria. However, if this assumption does not hold, and the  
280 growth rate of the two bacteria are the same (i.e. they are coupled), new (probably non-linear)  
281 constraints should be incorporated to the model (see Kerner et al., 2012 as an example). Once the  
282 meta-biomass equation was introduced, we use FBA to verify that the *iBSCc* model is consistent,  
283 allowing for a positive meta-biomass flux and the growth of each member of the consortium (see  
284 Supplementary Tables S3). This optimal flux distribution predicted by FBA (maximization of the  
285 meta-biomass, *i.e.* the growth rate of the *iBSCc* consortium) is analysed in the next section.

## 286 Metabolic analysis of the cedar aphid consortium

287 The overall structure of the models corroborates that the metabolic network of *B. aphidicola*  
288 BCc is specialised in the production of amino acids, while *S. symbiotica* SCc produces nucleotides  
289 and a large number of cofactors (Supplementary Fig S1). Moreover, the model predicts that *S.*  
290 *symbiotica* SCc can synthesize tryptophan from anthranilate, which has been shown to be  
291 provided by *B. aphidicola* BCc in a paradigmatic case of metabolic complementation (Gosalbes  
292 et al., 2008; Lamelas et al., 2011a; Manzano-Marín et al., 2016; Martínez-Cano et al., 2015).  
293 Another case of metabolic complementation between the two symbionts predicted by the model  
294 occurs in the biotin synthesis pathway, which takes place via the import of the precursor 8-amino-  
295 7-oxononanoate (8AONN), produced by *B. aphidicola* BCc, as recently suggested from genomic  
296 data (Manzano-Marín et al., 2016). Lysine biosynthesis also represents a case of  
297 complementation, based on the fact that the genome of *S. symbiotica* SCc encodes all activities  
298 of the pathway except the last one, which converts *meso*-diaminopimelate into lysine (Lamelas et  
299 al., 2011a). However, our model indicates that *meso*-diaminopimelate is used for the synthesis of  
300 peptidoglycan, while the complete lysine synthesis pathway is conserved in *B. aphidicola* BCc,  
301 suggesting that this complementation does not occur.

302 The FBA predictions showed that *B. aphidicola* BCc synthesizes and provides the host and *S.*  
303 *symbiotica* SCc with ten amino acids. *B. aphidicola* BCc also synthesizes anthranilate, 8AONN  
304 and shikimate and release them to the host compartment. In turn, *S. symbiotica* SCc imports  
305 anthranilate, 8AONN and shikimate, and use them as precursors for the biosynthesis of  
306 tryptophan, biotin and tetrahydrofolate (THF), respectively (see Fig 2 and Supplementary Table  
307 S3). Therefore, three events of metabolic complementation between the two symbionts are  
308 predicted, including the biosynthesis of tryptophan, biotin and THF; whereas the former two have  
309 been inferred previously from genomic analyses (Gosalbes et al., 2008; Manzano-Marín et al.,  
310 2016), the latter is a plausible as yet unidentified complementation case (see Fig 2). Folate cross-  
311 feeding has been described between *Serratia grimesii* and *Treponema primitia*, both members of  
312 the termite *Zootermopsis angusticollis* gut microbiome (Graber and Breznak, 2005). Since *C.*  
313 *cedri*, as animals in general, is not able to synthesize folate, and this is not included in the aphid’s  
314 diet, *Serratia* probably provides this essential cofactor to both the host and *Buchnera*.



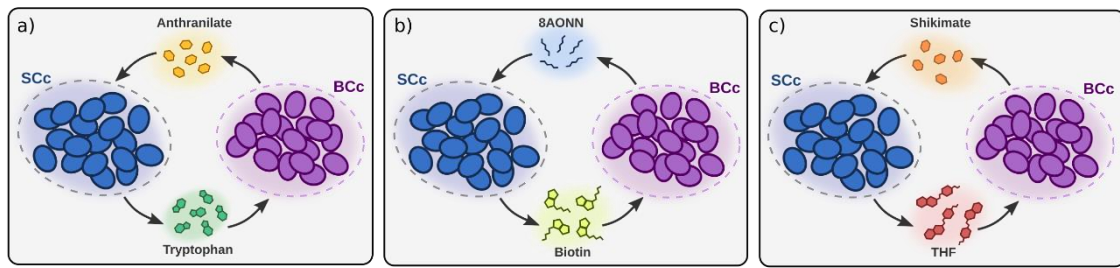

315

316 **Figure 2. Patterns of metabolic complementation predicted by iBSCc.** In a) the complementation for  
317 tryptophan biosynthesis, where BCc produces anthranilate and SCc uses it to produce tryptophan is shown.  
318 In b) and c) the complementation for the biosynthesis of biotin and THF, respectively, are shown.

319 Regarding *S. symbiotica* SCc, the iBSCc model predicts that it can synthesize, without need for  
320 complementation, cysteine, the four deoxynucleotides, the four triphosphate nucleosides, and  
321 thirteen cofactors and coenzymes. Several of these compounds may also be synthesized by the  
322 host (e.g. nucleotides, deoxynucleotides and NAD<sup>+</sup>), who might provide them to *B. aphidicola*  
323 BCc. Indeed, the aphid *A. pisum*, as most eukaryotes, is able to synthesize nitrogenous bases  
324 (Richards et al., 2010; Vellozo et al., 2011), which indicates that *C. cedri* also should. In this  
325 study, however, we will assume that it is *S. symbiotica* SCc who provides *Buchnera* with  
326 nucleotides and cofactors, and the host with cofactors such as biotin, riboflavin and THF.

## 327 Fragility analysis: can the networks be further reduced?

328 The construction of the metabolic models of two different endosymbionts with a notable  
329 difference in size allowed us to study whether the reductive evolutionary trends indeed generate  
330 smaller, more fragile networks. The robustness of the metabolic networks of the cedar aphid  
331 endosymbionts was assessed through *in-silico* knockout analyses conducted with two alternative  
332 approaches: FBA and MOMA. In the first place, the fragility of the whole consortium was  
333 considered by using the meta-biomass flux as an indicator of the viability. The results show that  
334 around the 85% (~88% using MOMA) of the genes coded by the endosymbionts are essential in  
335 order to sustain the growth of the whole system (see Supplementary Table S4). Then we focussed  
336 on the fragility of the individual endosymbionts networks. For the case of iBCc98 FBA predicted  
337 that 72 out of the 98 metabolic genes (~74%) are essential, while the MOMA analyses identify  
338 76 (~78%) as essential. The dispensable genes are mostly involved in catabolism, affecting the  
339 phosphate pentose pathway, glycolysis, respiratory chain and pyruvate fermentation (see  
340 Supplementary Table S4). When performing FBA robustness analyses on iSCc236, 209 genes  
341 (~88%) are predicted to be essential, whereas MOMA predicted 5 additional genes as essentials.  
342 The 28 dispensable genes predicted by both methods code for 36 enzymatic reactions involved  
343 mostly in biosynthetic pathways (e.g. nucleotides and cofactors), but also in the central carbon  
344 metabolism (e.g. the pentose phosphate pathway and glycolysis). If we consider the cell wall  
345 genes to be dispensable (since they have been repeatedly lost in endosymbiotic bacteria), the  
346 number of essential genes drops to 189 (~80%). Additionally, if it is also assumed that the host is  
347 who provides the nucleotides and deoxynucleotides, the percentage of essential genes drops to  
348 ~70% (data not shown). Although it might seem surprising that these estimates are higher or  
349 comparable to those obtained by using the smaller iBCc98 network, the iSCc236 model requires  
350 22 organic compounds to be imported, while iBCc98 requires 29, among which there are

351 nucleotides and cofactors such as NAD<sup>+</sup> and coenzyme A. Finally, a study of distributed  
352 robustness was performed through the analysis of the synthetic lethal (or double lethal) genes, *i.e.*  
353 pairs of non-essential genes whose simultaneous inactivation yields lethality (Wagner, 2005). In  
354 the case of *iBCc98*, *ca.* 15% of the pairwise combinations between the 26 non-essential genes  
355 predicted with FBA are predicted as synthetic lethal. These combinations include 20 of the non-  
356 essential genes, indicating that most of the dispensable genes have only a shallow degree of  
357 redundancy. On the other hand, *iSCc236* predicts only *ca.* 5% of the possible combinations  
358 between the 34 non-essential genes to be lethal. Moreover, by disregarding the cell wall  
359 biosynthesis genes as explained above, this number drops to *ca.* 2%.

## 360 In-silico reduction experiments: evaluating alternative evolutionary 361 scenarios

362 Although it is generally accepted that these patterns of complementation are the outcome of the  
363 process of genome reduction, whether such organization of the metabolic networks confer a  
364 selective advantage to the whole system or not, remains an open question. Previous work has  
365 focused on kinetic aspect of the problem, in particular the role of product inhibition as a plausible  
366 condition that may drive the emergence of metabolic complementation (Mori et al., 2016). Herein,  
367 we try to approach this problem from a structural point of view, by comparing the metabolic  
368 capabilities in alternative scenario of gene losses and retention within the three shared pathways.  
369 For this purpose, *iBSCc* was extended to represent a putative ancestral-state model of the  
370 consortium, named *iBSCc<sub>Ancest</sub>*, where the three shared pathways are still complete in both  
371 endosymbionts (see Supplementary Text S2). In this way, it is possible to compare how the  
372 different scenarios of gene loss and retention perform with respect to the putative ancestor as well  
373 as to the pattern of complementation exhibited by the cedar aphid consortium.

374 Using *iBSCc<sub>Ancest</sub>* the space of all viable and scenarios of gene loss and retention patterns  
375 (GLRP) were generated by removing, from this model every possible combination of genes, from  
376 single genes to the most reduced cases where only one copy of each gene remains present (at least  
377 one of the two copies for each gene needs to be functional). A GLRP is considered viable if, after  
378 removing the corresponding reactions, FBA predicts a meta-biomass flux greater than zero.  
379 Furthermore, in order to reduce the number of combination of possible GLRPs, the enzyme  
380 subsets (ES) *i.e.* groups of enzymes that always work together under steady state, were first  
381 computed for *iBSCc<sub>Ancest</sub>* (see the extended Material and Methods section in the Supplementary  
382 Text S2). Since removing an enzyme from an ES is equivalent to remove all the enzymes in the  
383 ES, each ES can be treated as a functional unit. Then, those genes coding for enzymes in the same  
384 ES were grouped together. Table 1 shows the structure of the ES for the three pathways considered  
385 in this study. Notably, the 32 enzyme activities are grouped in a total of 7 ESs. Due that in  
386 *iBSCc<sub>Ancest</sub>* each endosymbiont includes the 7 ES, the enumeration process yield a total of 2188  
387 viable GLRPs, which represent alternative consortium models. From this set, 128 are minimal  
388 GLRPs, *i.e.* only one copy of each gene remains active. It is worth to note that the pattern exhibited  
389 by the *C. cedri* consortium is not minimal since the genes coding for the three activities which  
390 allow the conversion of shikimate into chorismate are present (see table 1). In order to simplify  
391 the notation, each GLRP was coded by a sequence of symbols  $\Delta_n^m$ , where the subscript *n* (from 1  
392 to 7) denote the loss of the enzyme subset, by one of the endosymbionts, indicated by the supra

393 index  $m$ , which can be either  $B$  or  $S$  (*B. aphidicola* or *S. symbiotica*). Accordingly,  $\Delta_1^B$  represents  
 394 a simple GLRP where *B. aphidicola* has lost the ES1. A more complex example would be the  
 395 case of *iBSCc* (which is the actual pattern exhibited by *B. aphidicola* and *S. symbiotica* in the  
 396 cedar aphid). In this case, the GLRP is coded as follows:  $\Delta_1^S \Delta_3^S \Delta_4^B \Delta_5^B \Delta_6^S \Delta_7^B$ . Note that in this case  
 397 the ES2 is omitted because the genes involved in this ES are present in both endosymbionts, as  
 398 mentioned above (see Table 1).

399 **Table 1. Enzymatic activities and genes involved in the biosynthetic pathways of tryptophan,**  
 400 **THF and biotin as grouped in 7 enzyme subsets (ES). The IDs for the reactions and the**  
 401 **metabolites are as obtained from the BiGG database.**

402

| ES  | R. ID    | Formula                                         | E.C.      | Gene                      | BCc locus                 | SCc Locus      |
|-----|----------|-------------------------------------------------|-----------|---------------------------|---------------------------|----------------|
| ES1 | DDPA     | e4p+ h2o + pep → 2dda7p+ pi                     | 2.5.1.54  | <i>aroH</i>               | <i>BCc_077</i>            | -              |
|     | DHQS     | 2dda7p → 3dhq+ pi                               | 4.2.3.4   | <i>aroB</i>               | <i>BCc_352</i>            | -              |
|     | DHQD     | 3dhq → 3dhsk + h2o                              | 4.2.1.10  | <i>aroQ</i>               | <i>BCc_251</i>            | -              |
|     | SHK3Dr   | 3dhsk+ h + nadph → nadp + skm                   | 1.1.1.25  | <i>aroE</i>               | <i>BCc_312</i>            | -              |
| ES2 | SHKK     | atp + skm → adp + h + skm5p                     | 2.7.1.71  | <i>aroK</i>               | <i>BCc_353</i>            | <i>SCc_638</i> |
|     | PSCVT    | pep + skm5p → 3psme+ pi                         | 2.5.1.19  | <i>aroA</i>               | <i>BCc_191</i>            | <i>SCc_515</i> |
|     | CHORS    | 3psme → chor + pi                               | 4.2.3.5   | <i>aroC</i>               | <i>BCc_061</i>            | <i>SCc_617</i> |
| ES3 | ANS      | chor+ gln-L → anth+ glu-L + h + pyr             | 4.1.3.27  | <i>trpE</i> & <i>trpG</i> | <i>pT01</i> & <i>pT02</i> | -              |
| ES4 | ANPRT    | anth + prpp → ppi + pran                        | 2.4.2.18  | <i>trpD</i>               | -                         | <i>SCc_377</i> |
|     | PRAli    | pran → 2cpr5p                                   | 5.3.1.24  | <i>trpC</i>               | -                         | <i>SCc_378</i> |
|     | IGPS     | 2cpr5p + h → 3ig3p + co2 + h2o                  | 4.1.1.48  | <i>trpC</i>               | -                         | <i>SCc_378</i> |
|     | TRPS3    | 3ig3p → g3p + indole                            | 4.1.2.8   | <i>trpB</i>               | -                         | <i>SCc_379</i> |
| ES5 | GTPCI    | gtp + h2o → ahdt + for + h                      | 3.5.4.16  | <i>folE</i>               | -                         | <i>SCc_538</i> |
|     | DNTPPA   | ahdt + h2o → dhpmp + h + ppi                    | 3.6.1.-   | <i>nudB</i>               | -                         | Orphan         |
|     | DNMPPA   | dhpmp + h2o → dhnt + pi                         | 3.6.1.-   | <i>nudB</i>               | -                         | Orphan         |
|     | DHNPA2   | dhnt → 6hnhpt + gcald                           | 4.1.2.25  | <i>folB</i>               | -                         | Orphan         |
|     | HPPK2    | 6hnhpt + atp → 6hnhptpp + amp + h               | 2.7.6.3   | <i>folK</i>               | -                         | <i>SCc_275</i> |
|     | ADCS     | chor + gln_L → 4adcho + glu_L                   | 2.6.1.85  | <i>pabAB</i>              | -                         | <i>SCc_516</i> |
|     | ADCL     | 4adcho → 4abz + h + pyr                         | 4.1.3.38  | <i>pabC</i>               | -                         | <i>SCc_438</i> |
|     | DHPS2    | 4abz + 6hnhptpp → dhpt + ppi                    | 2.5.1.15  | <i>folP</i>               | -                         | <i>SCc_061</i> |
|     | DHFS     | atp + dhpt + glu_L → adp + dhf + h + pi         | 6.3.2.12  | <i>folC</i>               | -                         | <i>SCc_494</i> |
|     | DHFR     | dhf + h + nadph → nadp + thf                    | 1.5.1.3   | <i>folA</i>               | -                         | <i>SCc_118</i> |
| ES6 | MALCOAMT | amet + malcoa → ahcys + malcoame                | 2.1.1.197 | <i>bioC</i>               | Orphan                    | -              |
|     | OGMEACPS | h + malACP + malcoame → co2 + coa + ogmeACP     | 2.3.1.41  | <i>fabB</i>               | <i>BCc_056</i>            | -              |
|     | OGMEACPR | h + nadph + ogmeACP → hgmeACP + nadp            | 1.1.1.100 | <i>fabG</i>               | <i>BCc_217</i>            | -              |
|     | OGMEACPD | hgmeACP → egmeACP + h2o                         | 4.2.1.59  | <i>fabZ</i>               | <i>BCc_147</i>            | -              |
|     | EPMEACPR | epmeACP + h + nadh → nad + pmeACP               | 1.3.1.9   | <i>fabI</i>               | <i>BCc_167</i>            | -              |
|     | PMEACPE  | h2o + pmeACP → meoh + pimACP                    | 3.1.1.85  | <i>bioH</i>               | <i>BCc_356</i>            | -              |
|     | AOXSr2   | ala_L + pimACP → 8aonn + ACP + co2              | 2.3.1.47  | <i>bioF</i>               | Orphan                    | -              |
| ES7 | AMAOTr   | 8aonn + amet → amob + dann                      | 2.6.1.62  | <i>bioA</i>               | -                         | <i>SCc_554</i> |
|     | DBTSr    | atp + co2 + dann → adp + dtbt + (3) h + pi      | 6.3.3.3   | <i>bioD</i>               | -                         | <i>SCc_552</i> |
|     | BT5S     | amet + dtbt + h2s → btn + dad_5 + (3) h + met_L | 2.8.1.6   | <i>bioB</i>               | -                         | <i>SCc_553</i> |

403

404 The 2188 consortium models, which represent alternative evolutionary scenarios, were  
 405 evaluated using FBA in two ways by considering: i) the individual maximal production rate of  
 406 tryptophan ( $v_{Trp}^*$ ) THF ( $v_{THF}^*$ ) and biotin ( $v_{Btin}^*$ ); and ii) the whole system performance,

407 calculated by optimizing the meta-biomass production rate. In all the cases the optimal values are  
 408 normalized with respect to the optimal value showed by  $iBSCc_{Anc}$ . Figure 3 summarizes the results  
 409 of the reduction experiment in terms of the production capabilities of tryptophan, THF and biotin  
 410 for each GLRP. Firstly, the results show that for any of the three objectives, the production rates  
 411 of the different GLRPs exhibit a great variability (for more details see Supplementary Table S5).  
 412 This clearly shows that the way in which a pathway is distributed in a complementation event has  
 413 a profound impact in the pathway capabilities. In the case of the tryptophan production, the  
 414 different GLRPs can be divided into two main groups: i) a group of GLRPs (which includes  
 415  $iBSCc$ ) with a tryptophan production rate almost equal to the one exhibited by the putative  
 416 ancestor (*i.e.*  $v_{Trp}^* \sim 100\%$ ); and ii) a larger group of GLRPs with production rate  $v_{Trp}^* < 90\%$  (Fig  
 417 3a). Furthermore, when considering only the minimal GLRPs (*i.e.* cases with 50% of genes lost)  
 418 the gap is even larger, and there is only one GLRP with  $v_{Trp}^* \sim 100\%$  whereas the in other patterns  
 419  $v_{Trp}^* < 76\%$ . This minimal GLRP with  $v_{Trp}^* \sim 100\%$  corresponds to the pattern exhibited by  $iBSCc$   
 420 with the additional loss of the only set of redundant genes that remain present which form the ES2  
 421 (see Table 1).

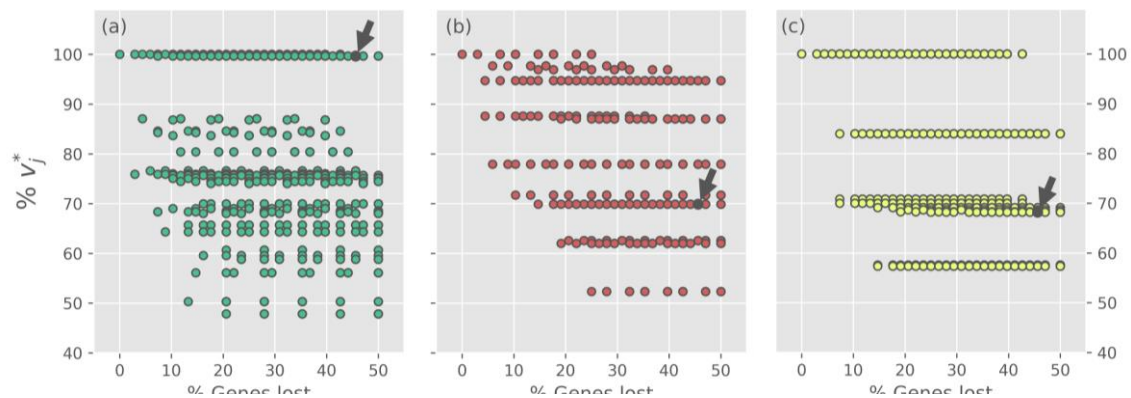

422 **Figure 3. Optimal production rates of tryptophan, THF and biotin for the different genes loss and**  
 423 **retention scenarios.** In each panel the normalized optimal production rate  $v_j^*$  is plotted against the  
 424 percentage of gene losses, for every gene loss scenario. From (a) to (c) the panels correspond to the  
 425 optimization of the rate  $v_j^*$  of production of tryptophan, THF and biotin, respectively (*i.e.*  $v_{Trp}^*$ ,  $v_{THF}^*$ ,  
 426  $v_{Btn}^*$ ). For each target, optimal production rates are normalized with respect the optimal value  
 427 exhibited by  $iBSCc_{Ancest}$ . The small arrow denotes the case of  $iBSCc$ , *i.e.* the cedar aphid consortium.  
 428

429 On the other hand, when considering the biosynthesis of THF and biotin, the results also show  
 430 a wide dispersion for the normalized production rate values exhibited by the different GLRPs.  
 431 However, unlike the case of the tryptophan, in these two cases the optimal production value  
 432 exhibited by  $iBSCc$  decreases considerably with respect to the value exhibited by the putative  
 433 ancestor (Fig 3b and 3c). For the case of the production of THF, all the GLRPs with the highest  
 434 normalized production rate ( $v_{THF}^* \sim 93\%$ ) and with more than 40% of the genes lost, shared the  
 435 following two losses:  $\Delta_1^S$  and  $\Delta_5^S$ , which correspond to the scenario in where *S. symbiotica* losses  
 436 the biosynthetic pathways of shikimate and THF. Whereas,  $\Delta_1^S$  is consistent with the GLRP shown  
 437 by  $iBSCc$ ,  $\Delta_5^S$  is the opposite, *i.e.* in the cedar aphid consortium *B. aphidicola* has lost the THF  
 438 biosynthetic pathway. Furthermore, in all those GLRPs which involve  $\Delta_5^B$  implies an important  
 439 drop in the normalized production rate  $v_{THF}^* < 72\%$  (Fig 3b). Something similar is found in the  
 440 case of the biotin biosynthesis where the GLRP of  $iBSCc$  implies  $v_{Btn}^* \sim 64\%$  (Fig 3c). According



441 to the results, when the system has lost more than 40% of the genes involved in the analyzed  
 442 pathways, those GLRPs with a biotin production rate closest to the one exhibited by putative  
 443 ancestor, share the same pattern ( $\Delta_6^B \Delta_7^S$ ), which is opposite to the one exhibited by *iBSCc*, *i.e.* *B.*  
 444 *aphidicola* losses the capability to synthesize 8AONN and retains the capability to produce biotin  
 445 from this precursor, whereas *S. symbiotica* exhibit the complementary pattern. Similar results are  
 446 found when considering the reduction of each pathway individually, *i.e.* when only single  
 447 pathway is considered redundant the GLRP include only the genes involved in the pathway (See  
 448 Supplementary Figures S2-4 and Supplementary Table S6).

449 After the analysis of how the different GLRPs perform over the production rates of individual  
 450 biomass components, the same study was conducted but using the meta-biomass production rate  
 451 as a proxy to study the fitness of the alternative evolutionary scenarios. The simulation results,  
 452 summarized in Fig 4, show that the value of the normalized meta-biomass production  
 453  $v_{meta-biomass}^*$  varies between 95 and 100%, compared to the putative ancestor (Fig 4a).  
 454 Although this range is quite narrow (Fig 4b), it may still play a role in a selective process, since  
 455 herein the solely stoichiometric rate is considered, and none other factor, such as the cost of  
 456 protein synthesis, is considered. Moreover, in a first look the results indicate that the *iBSCc* GLRP  
 457  $v_{meta-biomass}^*$  is quite close to the one of the putative ancestor.

458

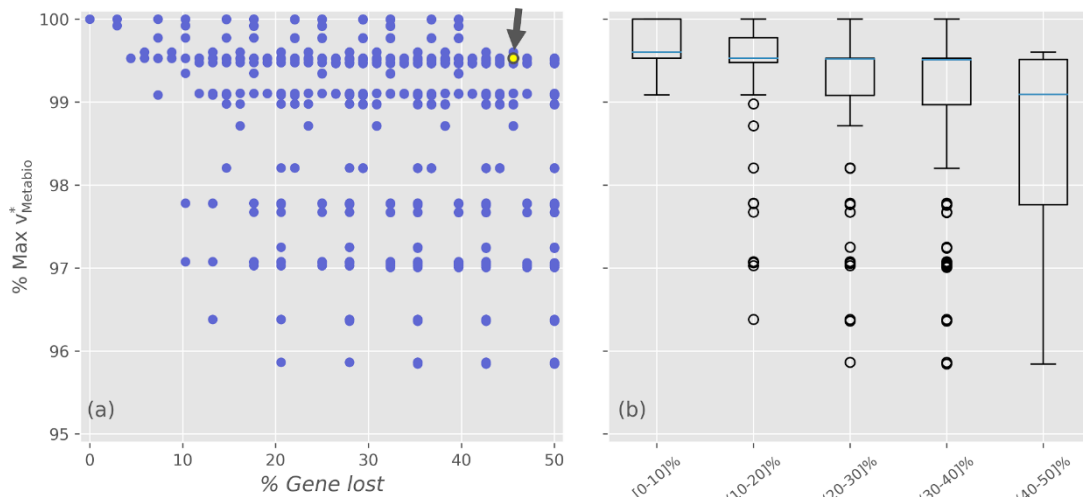

459 **Figure 4. Optimal meta-biomass production rates for the different gene losses and retention**  
 460 **scenarios.** (a) Normalized optimal meta-biomass production rate plotted against the percentage of  
 461 gene loss for each GLRP. (b) Different GLRPs were grouped by intervals of gene losses. The small  
 462 arrow denotes the case of *iBSCc*, *i.e.* the cedar aphid consortium.

463 A deeper insight into the results shows among the minimal GLRPs, 48 from 128 of them  
 464 (~37%) also show a  $v_{meta-biomass}^* > 99\%$ . Furthermore, within this set it is possible to find  
 465 opposite patterns, for example cases such as  $\Delta_3^S \Delta_4^S$  and  $\Delta_3^B \Delta_4^B$  implies that it would be barely the  
 466 same. Nevertheless, there are some particular patterns which are consistent, for example, all the  
 467 minimal GLRP which include the loss  $\Delta_3^B \Delta_4^S$  (*i.e.* the opposite pattern than the exhibited by *iBSCc*)  
 468 imply  $v_{meta-biomass}^* < 99\%$ . On the other hand, there are many GLRP which could represent  
 469 disadvantages in terms of the systems growth rate. Such would be outcompeted by other more  
 470 efficient organization of the complementation. Thus, considering only the structure of the



471 networks of the endosymbionts, the simulation indicates that although many GLRP are possible,  
472 the one that is observed in nature, at least for the case of the cedar aphid consortium, has both  
473 large degree of gene loss and large growth rate.

## 474 Discussion

### 475 Small metabolic networks from bacterial endosymbionts

476 The reconstruction and metabolic analysis of *B. aphidicola* BCc and *S. symbiotica* SCc, co-  
477 primary endosymbionts of the cedar aphid *C. cedri*, has allowed, in first place, the revision of the  
478 annotation of these organisms' genomes. Indeed, through the manual curation of these networks  
479 using the UM approach, it was possible to correct annotation errors in different enzymatic  
480 activities, and to identify previously unannotated metabolic genes. Moreover, the simulations  
481 performed here allowed the refinement of growth conditions and metabolic capabilities of these  
482 endosymbionts as compared to previous inferences from genomic analyses. Our study further  
483 confirms the validity of GEMs analysis for the phenotypic characterization of unculturable  
484 endosymbionts. On the other hand, the analysis of highly reduced metabolic networks, such as  
485 the case of *iBCc98*, bring into consideration methodological issues such as the case of the proton  
486 balance. Previously, a sensitivity analysis by Reed et al. (2003) in the genome-scale metabolic  
487 model of *E. coli* K12 *iJR904* revealed that the net proton balance could be positive or negative  
488 depending on the carbon source used in the growth simulations, which would acidify or basify  
489 the environment, respectively. Alas, these predictions remain empirically untested.

490 The effect caused by proton balance in GEMs is generally low due to the size of these networks.  
491 However, in endosymbionts and other small networks, it may generate notorious consequences.  
492 In *iBCc98*, for instance, it considerably reduces the versatility of the metabolism of *B. aphidicola*  
493 BCc by coupling presumably independent processes, such as ATP synthesis and the folate cycle,  
494 and over-producing amino acids. Although this metabolic organization would be clearly  
495 disadvantageous for a free-living organism, for an endosymbiont member of a nutritional  
496 symbiosis it may be selected for at the level of the host. Indeed, a similar behaviour has been  
497 described recently as applied to the whitefly endosymbiont *P. aleyrodidarum* (Calle-Espinosa et  
498 al., 2016), where the growth of the organism is coupled with the overproduction of amino acids  
499 and carotenoids as a consequence of its low energetic capabilities. This phenomenon might play  
500 a relevant role in the evolution of nutritional endosymbiosis but it may also represent a  
501 methodological artefact as a consequence of the lack of knowledge on how to formulate in such  
502 a model the transport of protons through the membrane. One possibility would be the use of  
503 protons for the transport of compounds against their gradients. Although the scarcity of annotated  
504 transporters in the *B. aphidicola* BCc genome (Charles et al., 2011) does not seem to support this  
505 scenario, this problem falls within a more general umbrella, whereby the nature of the cell  
506 envelope (including both the membrane composition and the transport systems) of endosymbionts  
507 is largely unknown and might rely on contributions from the host (McCutcheon, 2016).

### 508 Metabolic consequences of genome reduction

509 Simulations with and *iBCc98* and *iSCc236* indicate resemblance with previous metabolic

510 analyses from endosymbionts and other bacteria with reduced genomes. We found that these two  
511 networks contain very few dispensable genes, with essentiality estimates being around 88% of  
512 genes for *iSCc236*, and 73% for *iBCc98* (91% and 78%, respectively, according to MOMA).  
513 Although, these results may contradict the idea that the smaller the network, the higher the  
514 essentiality of its components, the percentage of essential genes predicted by *iSCc236* drastically  
515 drops to ~70%, when the cell wall genes are considered dispensable, and that the nucleotides and  
516 deoxynucleotides are provided by the host. Moreover, a further 15% and 5% of the genes,  
517 respectively, are genes that become essential after the deletion of another non-essential gene, thus  
518 displaying only a shallow degree of redundancy. Altogether, the amount of non-essential genes  
519 seems to positively correlate with the size of the network (Gil and Peretó, 2015). Moreover, a  
520 previous metabolic analysis of *B. aphidicola* APS showed that the network of this endosymbiont  
521 is also highly non-redundant, with 84% (94% according to MOMA) of genes being essential  
522 (Thomas et al., 2009). Although differences in the estimation algorithm and the selected criteria  
523 make these numbers not directly comparable, it does come to show that the *Buchnera* lineage  
524 evolved nearly minimal networks before the divergence of the Aphidinae and Lachninae aphid  
525 subfamilies, about 90 Mya. Moreover, although there are no available metabolic reconstructions  
526 for others *S. symbiotica* strains, the essentiality in the metabolic network of *S. symbiotica* SCc  
527 probably represents the high degree of genome reduction occurring in its symbiotic lineage, at  
528 1.76 Mb and only 672 (Lamelas et al., 2011b). This is likely the result of more recent evolutionary  
529 processes, since *S. symbiotica* from hosts within the Aphidinae subfamily display genomes larger  
530 than 2.5 Mb and contain over 2000 CDSs (Burke and Moran, 2011; Foray et al., 2014; Manzano-  
531 Marín and Latorre, 2016). This might indicate that the genome reduction process in *S. symbiotica*  
532 SCc occurred after the divergence of the Lachninae subfamily, ca. 55 Mya. Two other genomes  
533 from obligate *S. symbiotica* strains have been described within this subfamily, obtained from  
534 *Tuberolachnus salignus* (tribe Tuberolachnini) and *Cinara tujafilina* (Eulachnini). The former  
535 contains a genome of only 650 kb and 495 CDSs (Manzano-Marín et al., 2016), while the genome  
536 of the latter is in an early stage of reduction at 2.5 Mb and 1602 CDSs (Manzano-Marín and  
537 Latorre, 2014). If the transmission of *Serratia* was vertical and no replacement occurred in the *C.*  
538 *tujafilina* clade, as it has been suggested (Manzano-Marín and Latorre, 2016), extreme reductive  
539 processes observed in the *iSCc236* network may have been even more recent, possibly occurring  
540 no longer than 40 Mya.

541 Altogether, the two metabolic networks involved in the *C. cedri* consortium are highly  
542 constrained and fragile. This is also shown from the list of metabolic requirements that these  
543 organisms exhibit, which is increased by the high number of full and partial pathways that have  
544 been lost in both members of the consortium. Moreover, they show a high degree of integration,  
545 where both members have suffered massive losses, presumably due to division of labour with the  
546 bacterial partner. Cases of such losses are, for instance, the *B. aphidicola* BCc loss of the ability  
547 to produce cofactors like siroheme, biotin or THF, and, in *S. symbiotica* SCc, of the ability to  
548 produce several amino acids such as phenylalanine, threonine and branched amino acids. The  
549 model *iBSCc* establishes three cases of pathway sharing between the two symbionts, namely the  
550 biosynthesis of tryptophan, biotin and THF. These three pathways are partitioned between the  
551 two bacteria at the level of specific metabolites: anthranilate, 8AONN and shikimate, respectively  
552 (see Fig. 2). Those three exchanged metabolites are among the most permeable ones of the

553 participant intermediates, as it was predicted by our previous chemoinformatic analysis of  
554 metabolic complementation (Mori et al., 2016). Finally, the endosymbiont metabolic networks  
555 also show the need for metabolic complementation from compounds synthesised by the host. This  
556 is reflected by the requirement for the incorporation of metabolic intermediaries, not just end-  
557 products, from the external compartment. Simulations with the metabolic network of *S.*  
558 *symbiotica* SCc show that two biosynthetic pathways are completed by the host. The loss of the  
559 first activities in the biosynthesis of siroheme and coenzyme A generate the need for the import  
560 of metabolic intermediaries. For example, a similar case has been previously observed in  
561 *Blattabacterium*, symbiont of the cockroach *Blattella germanica*, where the initial steps in the  
562 biosynthesis of terpenes have been lost (Ponce-de-Leon et al., 2013). These events are likely to  
563 commonly evolve in organisms under genome reduction processes, enabled by key factors such  
564 as the redundancy of pathways and the feasibility for transport due to permeability of the  
565 compound or to the existence or exaptation of generalist transporters.

### 566 Emergence of metabolic complementation in endosymbiotic consortia

567 The simulations performed in this study with the reconstructed model of the consortium, *iBSCc*,  
568 reproduced the cases of metabolic complementation between the two bacterial partners that have  
569 been described in the literature, and predicted an additional one, the one involving the synthesis  
570 of THF in *S. symbiotica* SCc from the shikimate provided by *B. aphidicola* BCc. The emergence  
571 of metabolic complementation is a complex phenomenon and is not well understood from a  
572 theoretical perspective. Tryptophan biosynthesis is highly regulated at the transcriptional,  
573 translational and posttranslational levels. Notably, this pathway is negatively regulated through  
574 attenuation of the transcription of anthranilate synthase by tryptophan (Crawford, 1989), a process  
575 that has been suggested to facilitate the emergence of metabolic complementation (Mori et al.,  
576 2016). Genes for tryptophan synthesis from chorismate are present in most of the sequenced *B.*  
577 *aphidicola* genomes. In the cedar aphid, the genes encoding this pathway are divided in a *B.*  
578 *aphidicola* BCc plasmid containing *trpEG*, and a *S. symbiotica* SCc operon containing *trpABCD*.  
579 A strikingly identical case has been found to have occurred convergently in separate lineages of  
580 *Buchnera* and *Serratia* in the aphid *T. salignus* (Manzano-Marín et al., 2016). Moreover, the same  
581 complementation has been described in a completely different system, the one formed by *Ca.*  
582 *Carsonella ruddii* and secondary symbionts related to *Sodalis* and *Moranella*, in psyllids (Sloan  
583 and Moran, 2012). More complex cases of complementation in tryptophan biosynthesis also exist,  
584 such as the case of the mealybug symbionts, where this pathway seems to require the transport of  
585 multiple intermediaries, possibly including anthranilate (McCutcheon and von Dohlen, 2011).

586 Under this perspective, our simulations of all alternative GLRPs of metabolic  
587 complementations applied to the three shared pathways yielded novel results. We constructed  
588 models representing corresponding to alternative GLRPs from a hypothetical ancestor containing  
589 intact pathways in both symbionts, and compared how well they performed in maximizing the  
590 production of tryptophan, THF, biotin and meta-biomass, assuming that BCc and SCc are in  
591 proportion 1:1 in all the explored scenarios. Surprisingly, we've found that for the case of the  
592 tryptophan, the GLRP exhibited in the cedar aphid consortium behaved nearly optimality, and  
593 represented a quasi-minimal design in doing so. These results show that, from a structural point  
594 of view the actual distribution or division of a metabolic pathway between two organisms can

595 perform almost as well as their ancestor while using a smaller gene repertoire. Although, the cost  
596 of protein synthesis and genome replication cannot easily be integrated in this kind of analysis, it  
597 is expected that a reduction in such costs will improve the growth efficiency of an organism (Mori  
598 et. al 2016). On the other hand, the results indicate that the GLRP exhibited in the biotin and THF  
599 pathways is suboptimal, and there are other GLRPs which allow a greater flux using the same  
600 number of genes. However, is worth to note that the demand for these cofactors is probably much  
601 smaller than the demand for tryptophan, and thus the selective pressure for an efficient production  
602 of THF and biotin may be less stringent than the case of the amino acid. This situation may also  
603 reflect the limits of the simultaneous optimization of the diverse metabolic performances of a  
604 given network. In any case, the GLRP of the tryptophan biosynthesis exhibited by the consortium  
605 of the cedar aphid is convergent with the metabolic solution observed in the symbiotic consortium  
606 of the psyllid *Heteropsylla cubana* (Martínez-Cano et al., 2015).

607 On the other hand, the reduction experiment performed evaluating the meta-biomass equation  
608 indicate that the global GLRP exhibited by the cedar aphid consortium, is quasi-optimal in terms  
609 of yield, and nearly minimal in terms of gene number. Moreover, additional factors can influence  
610 the given structure, and confer more benefits. For instance, the fact that the first and the last steps  
611 of the pathway are performed in different compartments reduces the possibility that an  
612 accumulation of the end-product tryptophan would inhibit the first biosynthetic step by  
613 attenuation. This is despite the fact that the inhibition binding site for tryptophan is highly  
614 conserved (Mori et al., 2016), which might be due to constraints in the enzyme functional  
615 architecture. Besides the structure of the complementation, the pathway kinetics is also likely to  
616 be involved in the function and evolution of the metabolic complementation. However, the  
617 complexity associated to a kinetic model and the lack of experimentally-based parameters makes  
618 such a model implausible at a genome scale as of today. Future efforts to model complete  
619 metabolic systems at a genome scale beyond stoichiometric constraints, by adding reaction  
620 kinetics and higher-level processes, such as the cost of protein production and turnover, will shed  
621 more light into the structure, function and evolution of metabolism, and in the emergence of  
622 metabolic complementation.

## 623 Conclusions

624 The results and predictions obtained from GEMs, besides their intrinsic values, are useful as a  
625 tool to refine genomic and metabolic annotations. They also establish a powerful framework to  
626 interpret complex patterns of co-evolution, such as metabolic complementation. Here, we have  
627 reconstructed two genome-scale models from highly genome-reduced bacterial endosymbionts  
628 and integrate these models into a consortium model to study: (1) the requirements and exports of  
629 the bacterial partners to the host and to each other; (2) the robustness associated to reduced  
630 metabolic networks individually and by co-integration; and (3) the evolutionary constraints in the  
631 emergence of metabolic complementation designs. We could corroborate previously suggested  
632 scenarios for metabolic capabilities based on comparative genomic analyses. We also established  
633 that the cedar aphid consortium is composed not only of individual highly-reduced symbionts,  
634 but also that it is not far from a complete loss of metabolic redundancy and flexibility, thus making  
635 it a highly fragile partnership. Finally, we also showed that the patterns of metabolic  
636 complementation in this consortium are nearly minimal, in terms of gene content, and exhibit an

637 almost optimal growth rate, and tryptophan production, with respect to a putative ancestor where  
638 the complemented pathways are still completely coded by each symbiont. Therefore, our results  
639 suggest a higher role of adaptive evolution in the emergence of metabolic complementation than  
640 previously thought, and more studies in different consortia with both similar and different patterns  
641 of complementation designs will be invaluable to confirm the generality of these conclusions.

## 642 Author contributions

643 MP, FM, and JP conceived the work. MP, DT, and JCE developed the models. MP performed the  
644 simulations and analysed the data. All the authors discussed the results and wrote the manuscript.

## 645 Acknowledgements

646 We would like to thank the Obra Social Programme of La Caixa Savings Bank for the doctoral  
647 fellowship granted to JCE. Financial support from Spanish Government (grant reference:  
648 BFU2015-64322-C2-1-R co-financed by FEDER funds and Ministerio de Economía y  
649 Competitividad) and Generalitat Valenciana (grant reference: PROMETEOII/2014/065) is  
650 grateful acknowledged. MM acknowledges financial support from the Simons Foundation. DT  
651 acknowledges support by a European Union grant from the Marie Curie ITN SYMBIOMICS  
652 (264774) and a grant from the Knut and Alice Wallenberg Foundation (2012.0075), given to  
653 Björn Andersson (Karolinska Institute) and Siv Andersson (Uppsala University).  
654

## 655 References

- 656  
657 Altschul, S. F., Gish, W., Miller, W., Myers, E. W., and Lipman, D. J. (1990). Basic local  
658 alignment search tool. *J. Mol. Biol.* 215, 403–10. doi:10.1016/S0022-2836(05)80360-2.  
659 Ankras, N. Y. D., Luan, J., and Douglas, A. E. (2017). Cooperative metabolism in a three-  
660 partner insect-bacterial symbiosis revealed by metabolic modeling. *J. Bacteriol.*,  
661 JB.00872-16. doi:10.1128/JB.00872-16.  
662 Baumann, P., Moran, N. A., and Baumann, L. (2006). *The Prokaryotes*. , eds. M. Dworkin, S.  
663 Falkow, E. Rosenberg, K.-H. Schleifer, and E. Stackebrandt New York, NY: Springer  
664 New York doi:10.1007/0-387-30741-9.  
665 Belda, E., Silva, F. J., Peretó, J., and Moya, A. (2012). Metabolic networks of *Sodalis*  
666 *glossinidius*: a systems biology approach to reductive evolution. *PLoS One* 7, e30652.  
667 doi:10.1371/journal.pone.0030652.  
668 Burgard, A. P., Vaidyaraman, S., and Maranas, C. D. (2001). Minimal reaction sets for  
669 *Escherichia coli* metabolism under different growth requirements and uptake  
670 environments. *Biotechnol. Prog.* 17, 791–7. doi:10.1021/bp0100880.  
671 Burke, G. R., and Moran, N. A. (2011). Massive genomic decay in *Serratia symbiotica*, a  
672 recently evolved symbiont of aphids. *Genome Biol. Evol.* 3, 195–208.  
673 doi:10.1093/gbe/evr002.  
674 Calle-Espinosa, J., Ponce-de-Leon, M., Santos-Garcia, D., Silva, F. J., Montero, F., and Peretó,  
675 J. (2016). Nature lessons: The whitefly bacterial endosymbiont is a minimal amino acid  
676 factory with unusual energetics. *J. Theor. Biol.* 407, 303–317.  
677 doi:10.1016/j.jtbi.2016.07.024.  
678 Caspi, R., Altman, T., Billington, R., Dreher, K., Foerster, H., Fulcher, C. A., et al. (2014). The  
679 MetaCyc database of metabolic pathways and enzymes and the BioCyc collection of



- 680 Pathway/Genome Databases. *Nucleic Acids Res.* 42, D459-71. doi:10.1093/nar/gkt1103.
- 681 Charles, H., Balmand, S., Lamelas, A., Cottret, L., Pérez-Brocal, V., Burdin, B., et al. (2011). A
- 682 genomic reappraisal of symbiotic function in the aphid/Buchnera symbiosis: reduced
- 683 transporter sets and variable membrane organisations. *PLoS One* 6, e29096.
- 684 doi:10.1371/journal.pone.0029096.
- 685 Crawford, I. P. (1989). Evolution of a biosynthetic pathway: the tryptophan paradigm. *Annu.*
- 686 *Rev. Microbiol.* 43, 567–600. doi:10.1146/annurev.mi.43.100189.003031.
- 687 Douglas, A. E., Minto, L. B., and Wilkinson, T. L. (2001). Quantifying nutrient production by
- 688 the microbial symbionts in an aphid. *J. Exp. Biol.* 204, 349–58. Available at:
- 689 <http://www.ncbi.nlm.nih.gov/pubmed/11136620> [Accessed June 16, 2016].
- 690 Ebrahim, A., Lerman, J. A., Palsson, B. O., Hyduke, D. R., and Ebrahim A, Lerman JA, Palsson
- 691 BO, H. D. (2013). COBRApy: CONstraints-Based Reconstruction and Analysis for
- 692 Python. *BMC Syst. Biol.* 7, 74. doi:10.1186/1752-0509-7-74.
- 693 Faust, K., and Raes, J. (2012). Microbial interactions: from networks to models. *Nat. Rev.*
- 694 *Microbiol.* 10, 538–50. doi:10.1038/nrmicro2832.
- 695 Foray, V., Grigorescu, A. S., Sabri, A., Haubruge, E., Lognay, G., Francis, F., et al. (2014).
- 696 Whole-Genome Sequence of *Serratia symbiotica* Strain CWBI-2.3T, a Free-Living
- 697 Symbiont of the Black Bean Aphid *Aphis fabae*. *Genome Announc.* 2, e00767-14-e00767-
- 698 14. doi:10.1128/genomeA.00767-14.
- 699 Germerodt, S., Bohl, K., Lück, A., Pande, S., Schröter, A., Kaleta, C., et al. (2016). Pervasive
- 700 Selection for Cooperative Cross-Feeding in Bacterial Communities. *PLOS Comput. Biol.*
- 701 12, e1004986. doi:10.1371/journal.pcbi.1004986.
- 702 Gil, R., and Peretó, J. (2015). Small genomes and the difficulty to define minimal translation
- 703 and metabolic machineries. *Front. Ecol. Evol.* 3, 123. doi:10.3389/fevo.2015.00123.
- 704 Gomez-Valero, L., Soriano-Navarro, M., Perez-Brocal, V., Heddi, A., Moya, A., Garcia-
- 705 Verdugo, J. M., et al. (2004). Coexistence of *Wolbachia* with *Buchnera aphidicola* and a
- 706 Secondary Symbiont in the Aphid *Cinara cedri*. *J. Bacteriol.* 186, 6626–6633.
- 707 doi:10.1128/JB.186.19.6626-6633.2004.
- 708 González-Domenech, C. M., Belda, E., Patiño-Navarrete, R., Moya, A., Peretó, J., and Latorre,
- 709 A. (2012). Metabolic stasis in an ancient symbiosis: genome-scale metabolic networks
- 710 from two *Blattabacterium cuenoti* strains, primary endosymbionts of cockroaches. *BMC*
- 711 *Microbiol.* 12 Suppl 1, S5. doi:10.1186/1471-2180-12-S1-S5.
- 712 Gosalbes, M. J., Lamelas, A., Moya, A., and Latorre, A. (2008). The striking case of tryptophan
- 713 provision in the cedar aphid *Cinara cedri*. *J. Bacteriol.* 190, 6026–9.
- 714 doi:10.1128/JB.00525-08.
- 715 Graber, J. R., and Breznak, J. A. (2005). Folate cross-feeding supports symbiotic
- 716 homoacetogenic spirochetes. *Appl. Environ. Microbiol.* 71, 1883–1889.
- 717 doi:10.1128/AEM.71.4.1883-1889.2005.
- 718 Großkopf, T., and Soyer, O. S. (2016). Microbial diversity arising from thermodynamic
- 719 constraints. *ISME J.*, 1–9. doi:10.1038/ismej.2016.49.
- 720 Hansen, A. K., and Moran, N. A. (2011). Aphid genome expression reveals host-symbiont
- 721 cooperation in the production of amino acids. *Proc. Natl. Acad. Sci. U. S. A.* 108, 2849–54.
- 722 doi:10.1073/pnas.1013465108.
- 723 Henry, C. S., DeJongh, M., Best, A. a, Frybarger, P. M., Linsay, B., and Stevens, R. L. (2010).
- 724 High-throughput generation, optimization and analysis of genome-scale metabolic models.
- 725 *Nat. Biotechnol.* 28, 977–82. doi:10.1038/nbt.1672.
- 726 Karp, P. D., Latendresse, M., Paley, S. M., Ong, M. K. Q., Billington, R., Kothari, A., et al.
- 727 (2015). Pathway Tools version 19.0: Integrated Software for Pathway/Genome Informatics
- 728 and Systems Biology. *Brief. Bioinform.*, bbv079. doi:10.1093/bib/bbv079.
- 729 Kerner, A., Park, J., Williams, A., and Lin, X. N. (2012). A programmable *Escherichia coli*
- 730 consortium via tunable symbiosis. *PLoS One* 7, e34032.
- 731 doi:10.1371/journal.pone.0034032.
- 732 Lamelas, A., Gosalbes, M. J., Manzano-Marín, A., Peretó, J., Moya, A., and Latorre, A.
- 733 (2011a). *Serratia symbiotica* from the aphid *Cinara cedri*: a missing link from facultative

- 734 to obligate insect endosymbiont. *PLoS Genet.* 7, e1002357.  
735 doi:10.1371/journal.pgen.1002357.
- 736 Lamelas, A., Gosalbes, M. J., Moya, A., and Latorre, A. (2011b). New clues about the  
737 evolutionary history of metabolic losses in bacterial endosymbionts, provided by the  
738 genome of *Buchnera aphidicola* from the aphid *Cinara tujafilina*. *Appl. Environ.*  
739 *Microbiol.* 77, 4446–54. doi:10.1128/AEM.00141-11.
- 740 Li, L., Stoeckert, C. J., and Roos, D. S. (2003). OrthoMCL: identification of ortholog groups for  
741 eukaryotic genomes. *Genome Res.* 13, 2178–89. doi:10.1101/gr.1224503.
- 742 López-Sánchez, M. J., Neef, A., Peretó, J., Patiño-Navarrete, R., Pignatelli, M., Latorre, A., et  
743 al. (2009). Evolutionary convergence and nitrogen metabolism in *Blattabacterium* strain  
744 Bge, primary endosymbiont of the cockroach *Blattella germanica*. *PLoS Genet.* 5,  
745 e1000721. doi:10.1371/journal.pgen.1000721.
- 746 Macdonald, S. J., Lin, G. G., Russell, C. W., Thomas, G. H., and Douglas, A. E. (2012). The  
747 central role of the host cell in symbiotic nitrogen metabolism. *Proc. Biol. Sci.* 279, 2965–  
748 73. doi:10.1098/rspb.2012.0414.
- 749 MacDonald, S. J., Thomas, G. H., and Douglas, A. E. (2011). Genetic and metabolic  
750 determinants of nutritional phenotype in an insect-bacterial symbiosis. *Mol. Ecol.* 20,  
751 2073–84. doi:10.1111/j.1365-294X.2011.05031.x.
- 752 Manzano-Marín, A., and Latorre, A. (2014). Settling down: the genome of *Serratia symbiotica*  
753 from the aphid *Cinara tujafilina* zooms in on the process of accommodation to a  
754 cooperative intracellular life. *Genome Biol. Evol.* 6, 1683–1698. doi:10.1093/gbe/evu133.
- 755 Manzano-Marín, A., and Latorre, A. (2016). Snapshots of a shrinking partner: Genome  
756 reduction in *Serratia symbiotica*. *Sci. Rep.* 6, 32590. doi:10.1038/srep32590.
- 757 Manzano-Marín, A., Simon, J. C., and Latorre, A. (2016). Reinventing the wheel and making it  
758 round again: Evolutionary convergence in *Buchnera-serratia* symbiotic consortia between  
759 the distantly related Lachninae aphids *Tuberolachnus salignus* and *Cinara cedri*. *Genome*  
760 *Biol. Evol.* 8, 1440–1458. doi:10.1093/gbe/evw085.
- 761 Martínez-Cano, D. J., Reyes-Prieto, M., Martínez-Romero, E., Partida-Martínez, L. P., Latorre,  
762 A., Moya, A., et al. (2015). Evolution of small prokaryotic genomes. *Front. Microbiol.* 5,  
763 742. doi:10.3389/fmicb.2014.00742.
- 764 McCutcheon, J. P. (2016). From microbiology to cell biology: when an intracellular bacterium  
765 becomes part of its host cell. *Curr. Opin. Cell Biol.* 41, 132–6.  
766 doi:10.1016/j.ceb.2016.05.008.
- 767 McCutcheon, J. P., and Moran, N. A. (2011). Extreme genome reduction in symbiotic bacteria.  
768 *Nat. Rev. Microbiol.* 10, 13–26. doi:10.1038/nrmicro2670.
- 769 McCutcheon, J. P., and von Dohlen, C. D. (2011). An interdependent metabolic patchwork in  
770 the nested symbiosis of mealybugs. *Curr. Biol.* 21, 1366–72.  
771 doi:10.1016/j.cub.2011.06.051.
- 772 Moran, N. A. (1996). Accelerated Evolution and Muller's Ratchet in Endosymbiotic Bacteria.  
773 *Proc. Natl. Acad. Sci.* 93, 2873–2878. Available at:  
774 <http://www.pnas.org/content/93/7/2873> [Accessed May 29, 2012].
- 775 Moran, N. A., and Bennett, G. M. (2014). The Tiniest Tiny Genomes. *Annu. Rev. Microbiol.* 68,  
776 195–215. doi:10.1146/annurev-micro-091213-112901.
- 777 Mori, M., Ponce-de-León, M., Peretó, J., and Montero, F. (2016). Metabolic Complementation  
778 in Bacterial Communities: Necessary Conditions and Optimality. *Front. Microbiol.* 7,  
779 1553. doi:10.3389/fmicb.2016.01553.
- 780 Moya, A., Peretó, J., Gil, R., and Latorre, A. (2008). Learning how to live together: genomic  
781 insights into prokaryote-animal symbioses. *Nat. Rev. Genet.* 9, 218–29.  
782 doi:10.1038/nrg2319.
- 783 Orth, J. D., Conrad, T. M., Na, J., Lerman, J. A., Nam, H., Feist, A. M., et al. (2011). A  
784 comprehensive genome-scale reconstruction of *Escherichia coli* metabolism--2011. *Mol.*  
785 *Syst. Biol.* 7, 535. doi:10.1038/msb.2011.65.
- 786 Orth, J. D., Thiele, I., and Palsson, B. Ø. (2010). What is flux balance analysis? *Nat. Biotechnol.*  
787 28, 245–8. doi:10.1038/nbt.1614.

- 788 Pál, C., Papp, B., Lercher, M. J., Csermely, P., Oliver, S. G., and Hurst, L. D. (2006). Chance  
789 and necessity in the evolution of minimal metabolic networks. *Nature* 440, 667–70.  
790 doi:10.1038/nature04568.
- 791 Patiño-Navarrete, R., Piulachs, M.-D., Belles, X., Moya, A., Latorre, A., and Peretó, J. (2014).  
792 The cockroach *Blattella germanica* obtains nitrogen from uric acid through a metabolic  
793 pathway shared with its bacterial endosymbiont. *Biol. Lett.* 10.  
794 doi:10.1098/rsbl.2014.0407.
- 795 Pérez-Brocal, V., Gil, R., Ramos, S., Lamelas, A., Postigo, M., Michelena, J. M., et al. (2006).  
796 A small microbial genome: the end of a long symbiotic relationship? *Science* (80-. ). 314,  
797 312–313. doi:10.1126/science.1130441.
- 798 Poliakov, A., Russell, C. W., Ponnala, L., Hoops, H. J., Sun, Q., Douglas, A. E., et al. (2011).  
799 Large-scale label-free quantitative proteomics of the pea aphid-Buchnera symbiosis. *Mol.*  
800 *Cell. Proteomics* 10, M110.007039. doi:10.1074/mcp.M110.007039.
- 801 Ponce-de-Leon, M., Montero, F., and Peretó, J. (2013). Solving gap metabolites and blocked  
802 reactions in genome-scale models: application to the metabolic network of *Blattabacterium*  
803 *cuenoti*. *BMC Syst. Biol.* 7, 114. doi:10.1186/1752-0509-7-114.
- 804 Price, D. R. G., and Wilson, A. C. C. (2014). A substrate ambiguous enzyme facilitates genome  
805 reduction in an intracellular symbiont. *BMC Biol.* 12, 110. doi:10.1186/s12915-014-0110-  
806 4.
- 807 Reed, J. L., Vo, T. D., Schilling, C. H., and Palsson, B. O. (2003). An expanded genome-scale  
808 model of *Escherichia coli* K-12 {(iJR904) {GSM/GPR}}. *Genome Biol.* 4, R54.  
809 doi:10.1186/gb-2003-4-9-r54.
- 810 Richards, S., Gibbs, R. A., Gerardo, N. M., Moran, N., Nakabachi, A., Stern, D., et al. (2010).  
811 Genome sequence of the pea aphid *Acyrtosiphon pisum*. *PLoS Biol.* 8, e1000313.  
812 doi:10.1371/journal.pbio.1000313.
- 813 Russell, C. W., Bouvaine, S., Newell, P. D., and Douglas, A. E. (2013). Shared metabolic  
814 pathways in a coevolved insect-bacterial symbiosis. *Appl. Environ. Microbiol.* 79, 6117–  
815 23. doi:10.1128/AEM.01543-13.
- 816 Russell, C. W., Poliakov, A., Haribal, M., Jander, G., van Wijk, K. J., and Douglas, A. E.  
817 (2014). Matching the supply of bacterial nutrients to the nutritional demand of the animal  
818 host. *Proc. Biol. Sci.* 281, 20141163. doi:10.1098/rspb.2014.1163.
- 819 Sabater-Muñoz, B., Toft, C., Alvarez-Ponce, D., and Fares, M. A. (2017). Chance and necessity  
820 in the genome evolution of endosymbiotic bacteria of insects. *ISME J.* 11, 1291–1304.  
821 doi:10.1038/ismej.2017.18.
- 822 Schellenberger, J., Park, J. O., Conrad, T. M., and Palsson, B. Ø. (2010). BiGG: a Biochemical  
823 Genetic and Genomic knowledgebase of large scale metabolic reconstructions. *BMC*  
824 *Bioinformatics* 11, 213. doi:10.1186/1471-2105-11-213.
- 825 Segrè, D., Vitkup, D., and Church, G. M. (2002). Analysis of optimality in natural and  
826 perturbed metabolic networks. *Proc. Natl. Acad. Sci. U. S. A.* 99, 15112–7.  
827 doi:10.1073/pnas.232349399.
- 828 Seth, E. C., and Taga, M. E. (2014). Nutrient cross-feeding in the microbial world. *Front.*  
829 *Microbiol.* 5, 350. doi:10.3389/fmicb.2014.00350.
- 830 Sloan, D. B., and Moran, N. A. (2012). Genome reduction and co-evolution between the  
831 primary and secondary bacterial symbionts of psyllids. *Mol. Biol. Evol.* 29, 3781–92.  
832 doi:10.1093/molbev/mss180.
- 833 Thiele, I., and Palsson, B. Ø. (2010). A protocol for generating a high-quality genome-scale  
834 metabolic reconstruction. *Nat. Protoc.* 5, 93–121. doi:10.1038/nprot.2009.203.
- 835 Thomas, G. H., Zucker, J., Macdonald, S. J., Sorokin, A., Goryanin, I., and Douglas, A. E.  
836 (2009). A fragile metabolic network adapted for cooperation in the symbiotic bacterium  
837 *Buchnera aphidicola*. *{BMC} Syst. Biol.* 3, 24. doi:10.1186/1752-0509-3-24.
- 838 Van Leuven, J. T., Meister, R. C., Simon, C., and McCutcheon, J. P. (2014). Sympatric  
839 speciation in a bacterial endosymbiont results in two genomes with the functionality of  
840 one. *Cell* 158, 1270–80. doi:10.1016/j.cell.2014.07.047.
- 841 Vellozo, A. F., V??ron, A. S., Baa-Puyoulet, P., Huerta-Cepas, J., Cottret, L., Febvay, G., et al.

- 842 (2011). CycADS: An annotation database system to ease the development and update of  
843 BioCyc databases. *Database* 2011, bar008. doi:10.1093/database/bar008.  
844 Wernegreen, J. J. (2002). Genome evolution in bacterial endosymbionts of insects. *Nat. Rev.*  
845 *Genet.* 3, 850–861. doi:10.1038/nrg931.  
846 Whitehead, L. F., and Douglas, A. E. (1993). Populations of Symbiotic Bacteria in the  
847 Parthenogenetic Pea Aphid (*Acyrtosiphon pisum*) Symbiosis. *Proc. R. Soc. B Biol. Sci.*  
848 254, 29–32. doi:10.1098/rspb.1993.0122.  
849 Wu, D., Daugherty, S. C., Van Aken, S. E., Pai, G. H., Watkins, K. L., Khouri, H., et al. (2006).  
850 Metabolic complementarity and genomics of the dual bacterial symbiosis of sharpshooters.  
851 *PLoS Biol.* 4, e188. doi:10.1371/journal.pbio.0040188.  
852 Zientz, E., Dandekar, T., and Gross, R. (2004). Metabolic interdependence of obligate  
853 intracellular bacteria and their insect hosts. *Microbiol. Mol. Biol. Rev.* 68, 745–70.  
854 doi:10.1128/MMBR.68.4.745-770.2004.  
855

## Supplementary Material

**Supplementary Text S1. Extended results.** The text include four sections, two including details about the reconstruction and metabolic capabilities of the endosymbiont individual models. The other two sections, correspond to the estimations of the proteome composition of *C. cedri* and to the construction of the meta-biomass.

**Supplementary Text S2. Extended Materials and Methods.** The text include details on the annotated genomes, constraint-based method employed, as well as the reconstruction of the plausible ancestor model of *C. cedri* used as a references point in the reduction experiments.

**Supplementary Figure S1. Conversion map predicted by iBCc98 and iSCc236.** Rows represent imported compounds, and columns, biomass components synthesized by each organism. Coloured squares in the same columns indicate the set of compounds required for the biosynthesis of a component. Purple and blue squares correspond to capabilities predicted by iBCc98 and iSCc236, respectively. Marked columns (\*) correspond to compounds produced by both bacteria.

**Supplementary Figure S2. Optimal production rates of tryptophan for the reduced genes loss and retention experiments.** Normalized optimal production rate of tryptophan normalized with respect the optimal value exhibited. The small arrow denote the case of iBSCc, *i.e.* the cedar aphid consortium.

**Supplementary Figure S3. Optimal production rates of tetrahydrofolate for the reduced genes loss and retention experiments.** Normalized optimal production rate of tetrahydrofolate normalized with respect the optimal value exhibited. The small arrow denote the case of iBSCc, *i.e.* the cedar aphid consortium.

**Supplementary Figure S4. Optimal production rates of biotin for the reduced genes loss and retention experiments.** Normalized optimal production rate of biotin normalized with respect the optimal value exhibited. The small arrow denote the case of iBSCc, *i.e.* the cedar aphid consortium.

**Supplementary Table S1. Genome-scale metabolic model of *Serratia symbiotica* SCc iSCc236.** The spreadsheet in XLS format includes the iSCc236 model description. It contains

three tables: one that corresponds to the reactions; the second includes exchange fluxes; and in the third is the information of the metabolites.

**Supplementary Table S2. Genome-scale metabolic model of *Buchnera aphidicola* BCc iBCc98.** The file corresponds to the representation of the model iBCc98 in spreadsheet format, and includes the following four sheets: i) the list of reactions; (ii) listing of exchange fluxes; (iii) listing of metabolites; iv) the list of reactions and metabolic genes that were not included in the model.

**Supplementary Table S3. Genome-scale metabolic model of endosymbiotic consortium of the cedar aphid *C. cedri* iBSCc.** The file corresponds to the representation of the model iBSCc in spreadsheet format, and includes the following five sheets: i) the list of reactions; (ii) listing of exchange fluxes; (iii) listing of metabolites; iv) the optimal flux distribution that maximizes the growth of the whole system; and v) the exchange patterns between the consortium members.

**Supplementary Table S4. Results from the robustness analysis.** The table include two sheets. The first sheet list the results from the single KO *in-silico* experiments, whereas the second sheet include the results of the double KO *in-silico* experiments.

**Supplementary Table S5. Results from *in-silico* reduction experiments.** The table includes two sheets. The first sheet summarize the results from the reduction experiments and the second sheet includes a table with a mapping between Enzyme Subsets and the reactions IDs.

**Supplementary Table S6. Results from the reduced *in-silico* reduction experiments.** The table includes three sheets. Each sheet include the results of the reduction experiment for the tryptophan, tetrahydrofolate and biotin, when only the genes involved in each single pathway are considered for the experiment.

**Supplementary File S1. SBML models: iBCc98, iSCc236 and iBSCc.**
